# Supplementary material for: An Efficient, Counter-Selection-Based Method for Prophage Curing in Pseudomonas aeruginosa Strains
Source: Viruses. 2021 Feb 21;13(2):336. doi: 10.3390/v13020336 (PMC7926659; doi:10.3390/v13020336)
Supplement: Supplementary file 1 [file viruses-13-00336-s001.pdf]

## **Supplementary materials**

### **Supplementary methods**

#### **Inducible phage extraction**

LB (2 ml) was inoculated with 39016 strain incubated overnight. On the next day, the bacteria were diluted 1:50 with medium to a final volume of 4 ml and incubated until reaching OD 0.5 at 595nm (~2 hours). For phage induction, 0.4 µg/ml norfloxacin (sigma) antibiotic was added, and the cultures were incubated for 1 hour. Fresh LB was added (1.75 mL), and the cultures were incubated for an additional one hour. Then, 1 ml of bacteria was centrifuged at 14,000g for 2 min, and 900 µl of the supernatant was filtered using a 0.45 µm filter (Whatman). For PCR amplification, the extracted phages were treated with 1 µg/ml DNaseI for 60 min at 37°, followed by inactivation of the enzyme activity by incubation at 65° for 15 min.

#### **Growth curve**

LB (2 mL) was inoculated with bacterial strains from frozen stocks and incubated overnight at 37°C with shaking (250 rpm). The culture was diluted to 0.005 OD (595 nm) in fresh media and transferred to a 96-well plate, 200µl in each well. The plates were incubated for 15 hours at 37°C with agitation. Optical density measurements at 595 nm were taken every 30 minutes using the Synergy™ 2 Multi-Detection Microplate Reader (BioTek).

**Table S1:** Primers used in the study

| Primer                 | Sequence                                           |
|------------------------|----------------------------------------------------|
| M13_F                  | CCCAGTCACGACGTTGTAAAACG                            |
| M13_R                  | AGCGGATAACAATTCACACAGG                             |
| AmpR_F                 | CGCGGAACCCCTATTTGTT                                |
| AmpR_R                 | TTACCAATGCTTAATCAGTGAGG                            |
| PR2_500Dn_R            | AAGCTTAGGCGATCCAGGCCGAC                            |
| PR2_500up_F            | GAGCTCTATTTTATTGCGACGACAGCG                        |
| PR2_AmpRin_Seq_F       | GAGCTCATAGATCACCCCTTGCTCG                          |
| PR2_AmpRin_Up_F_GWB1   | GGGGACAAGTTTGTACAAAAAGCAGGCTCACAAGCCATTTGCACCAGCAG |
| PR2_AmpRin_Up_R        | AACAAATAGGGGTTCCGCGGATACCATGAAACGAGCAACC           |
| PR2_AmpRin_Down_F      | CCTCACTGATTAAGCATTGGTAACTACTTGCTGATGCCGATGAA       |
| PR2_AmpRin_Down_R_GWB2 | GGGGACCACTTTGTACAAGAAAGCTGGGTAGTGACGACGCTGTTCCAGA  |
| PR2_AmpRin_Seq_R       | GAATTCGTTGAGGGTATGAAGGTTG                          |
| PR2_SacBin_Up_F_GWB1   | GGGGACAAGTTTGTACAAAAAGCAGGCTCAAACACGGCGAAGCAGAGCT  |
| PR2_SacBin_Up_R        | GCGCGCACGTATCAACAGATTCAAGCCGCATCGAGCAAC            |
| PR2_SacBin_Down_F      | ATCTGTTGATACGTGCGCGC                               |
| PR2_SacBin_Down_R_GWB2 | GGGGACCACTTTGTACAAGAAAGCTGGGTATAGCTGCGTGTGGCTTGC   |
| Pf4_RF_F               | AGCAGCGCGATGAAGCAAT                                |
| Pf4_RF_R               | TAGAGGCCATTTGTGACTGGA                              |
| Pf4_seq_F              | TACGAGGCTGTTGAGGAGTTA                              |
| Pf4_seq_R              | CCGTGCCGAGGTAGTGATGTC                              |
| PR5_seq_F              | TCAAACCATCCAATAGCTGGC                              |
| PR5_seq_R              | GGCGGCAGGCGTATCCTT                                 |
| PA39016_100004_F       | ATGGTTAAGAAATTCTCCGAC                              |
| PA39016_100004_R       | TTAGGCGCCCCGCTCTTC                                 |

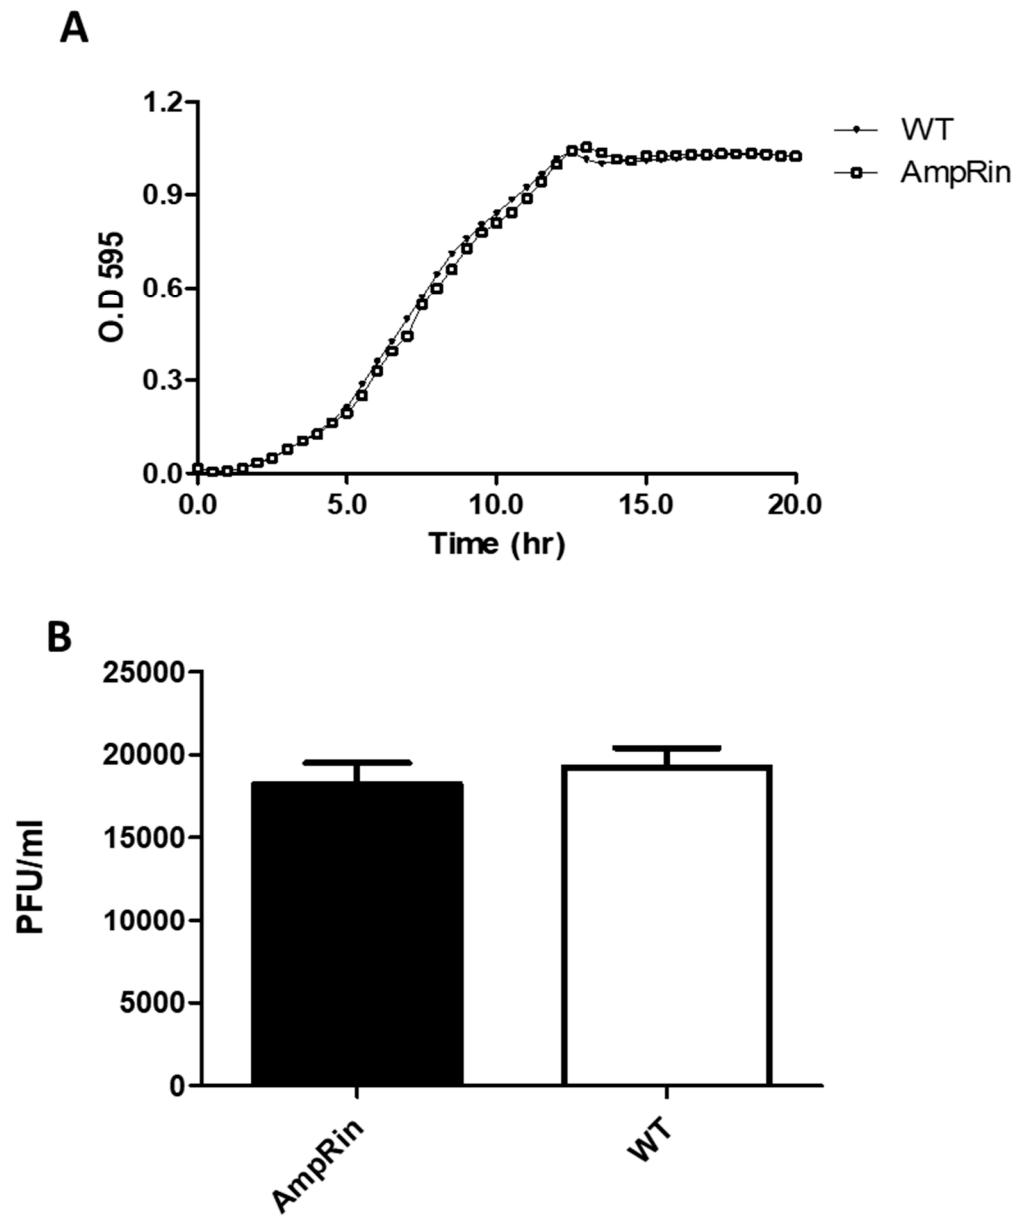

**Figure S1: *ampR* insertion into the PR2 prophage did not alter the bacterial growth and PAO1-infectious phages production.** (A) The growth curve of *ampR* inserted strain (AmpRin) compared to WT 39016; OD was measured automatically every 30 min. (B) Plaque forming units count, PAO1 was used as a host, phages were induced and extracted from WT, and the *ampR* inserted strain (AmpRin). The above graphs are the average of two independent experiments consisting of (A) five replicates each (B) three replicates each. Error bars represent the standard deviations.

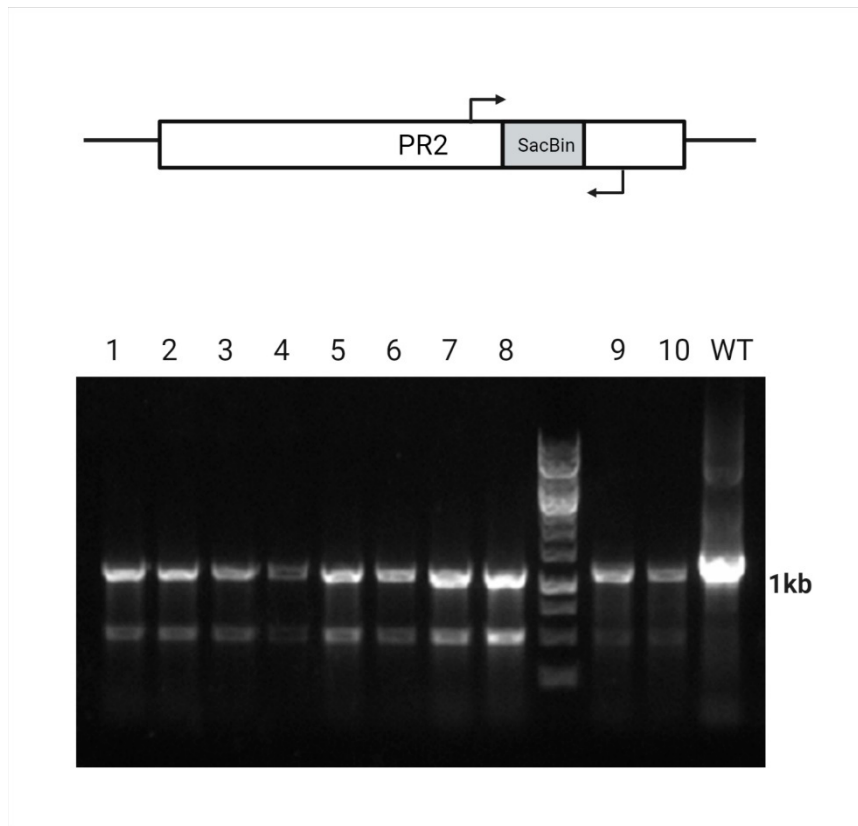

**Figure S2:** The SacBin region presents in PR2-cured colonies. PCR amplification of 1100bp SacBin region; lanes 1-8 represent randomly picked Crb-sensitive colonies, lanes 9-10 represent Crb-resistant colonies, and the WT 39016 lane for positive control. The *PR2\_SacBin\_Up\_F\_GWB1* and *SacBin\_Down\_R\_GWB2* were used for the amplification.

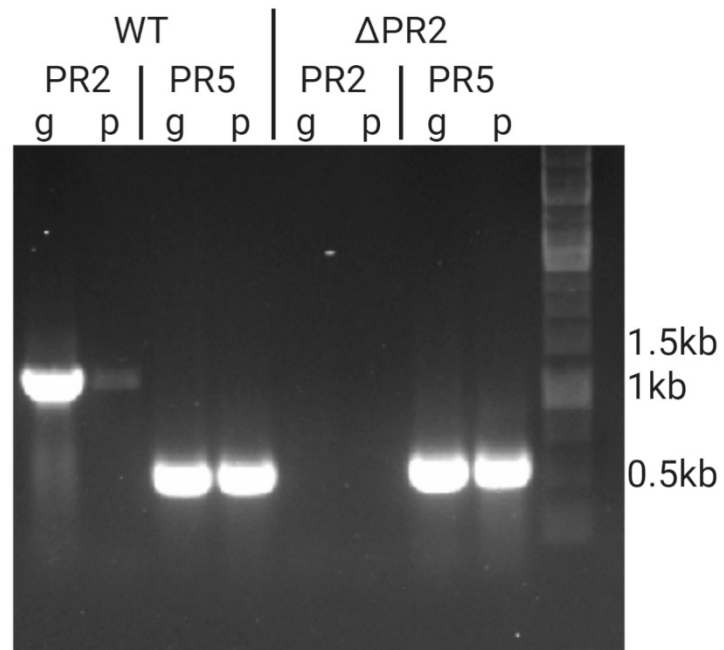

**Figure S3:** PR2 phages are not produced in the cured strain. PCR amplification of 1200bp region from PR2 phage and 500bp region from a different inducible-prophage (PR5), both for genomic DNA (g) and for phages induced and extracted (p) from 39016 WT and  $\Delta$ PR2 strains.
